# Supplementary material
Source: publisher site journal article supplement (https://www.dovepress.com/article/458013)
Supplement: Supplementary file 1 [file get_supplementary_file.php]

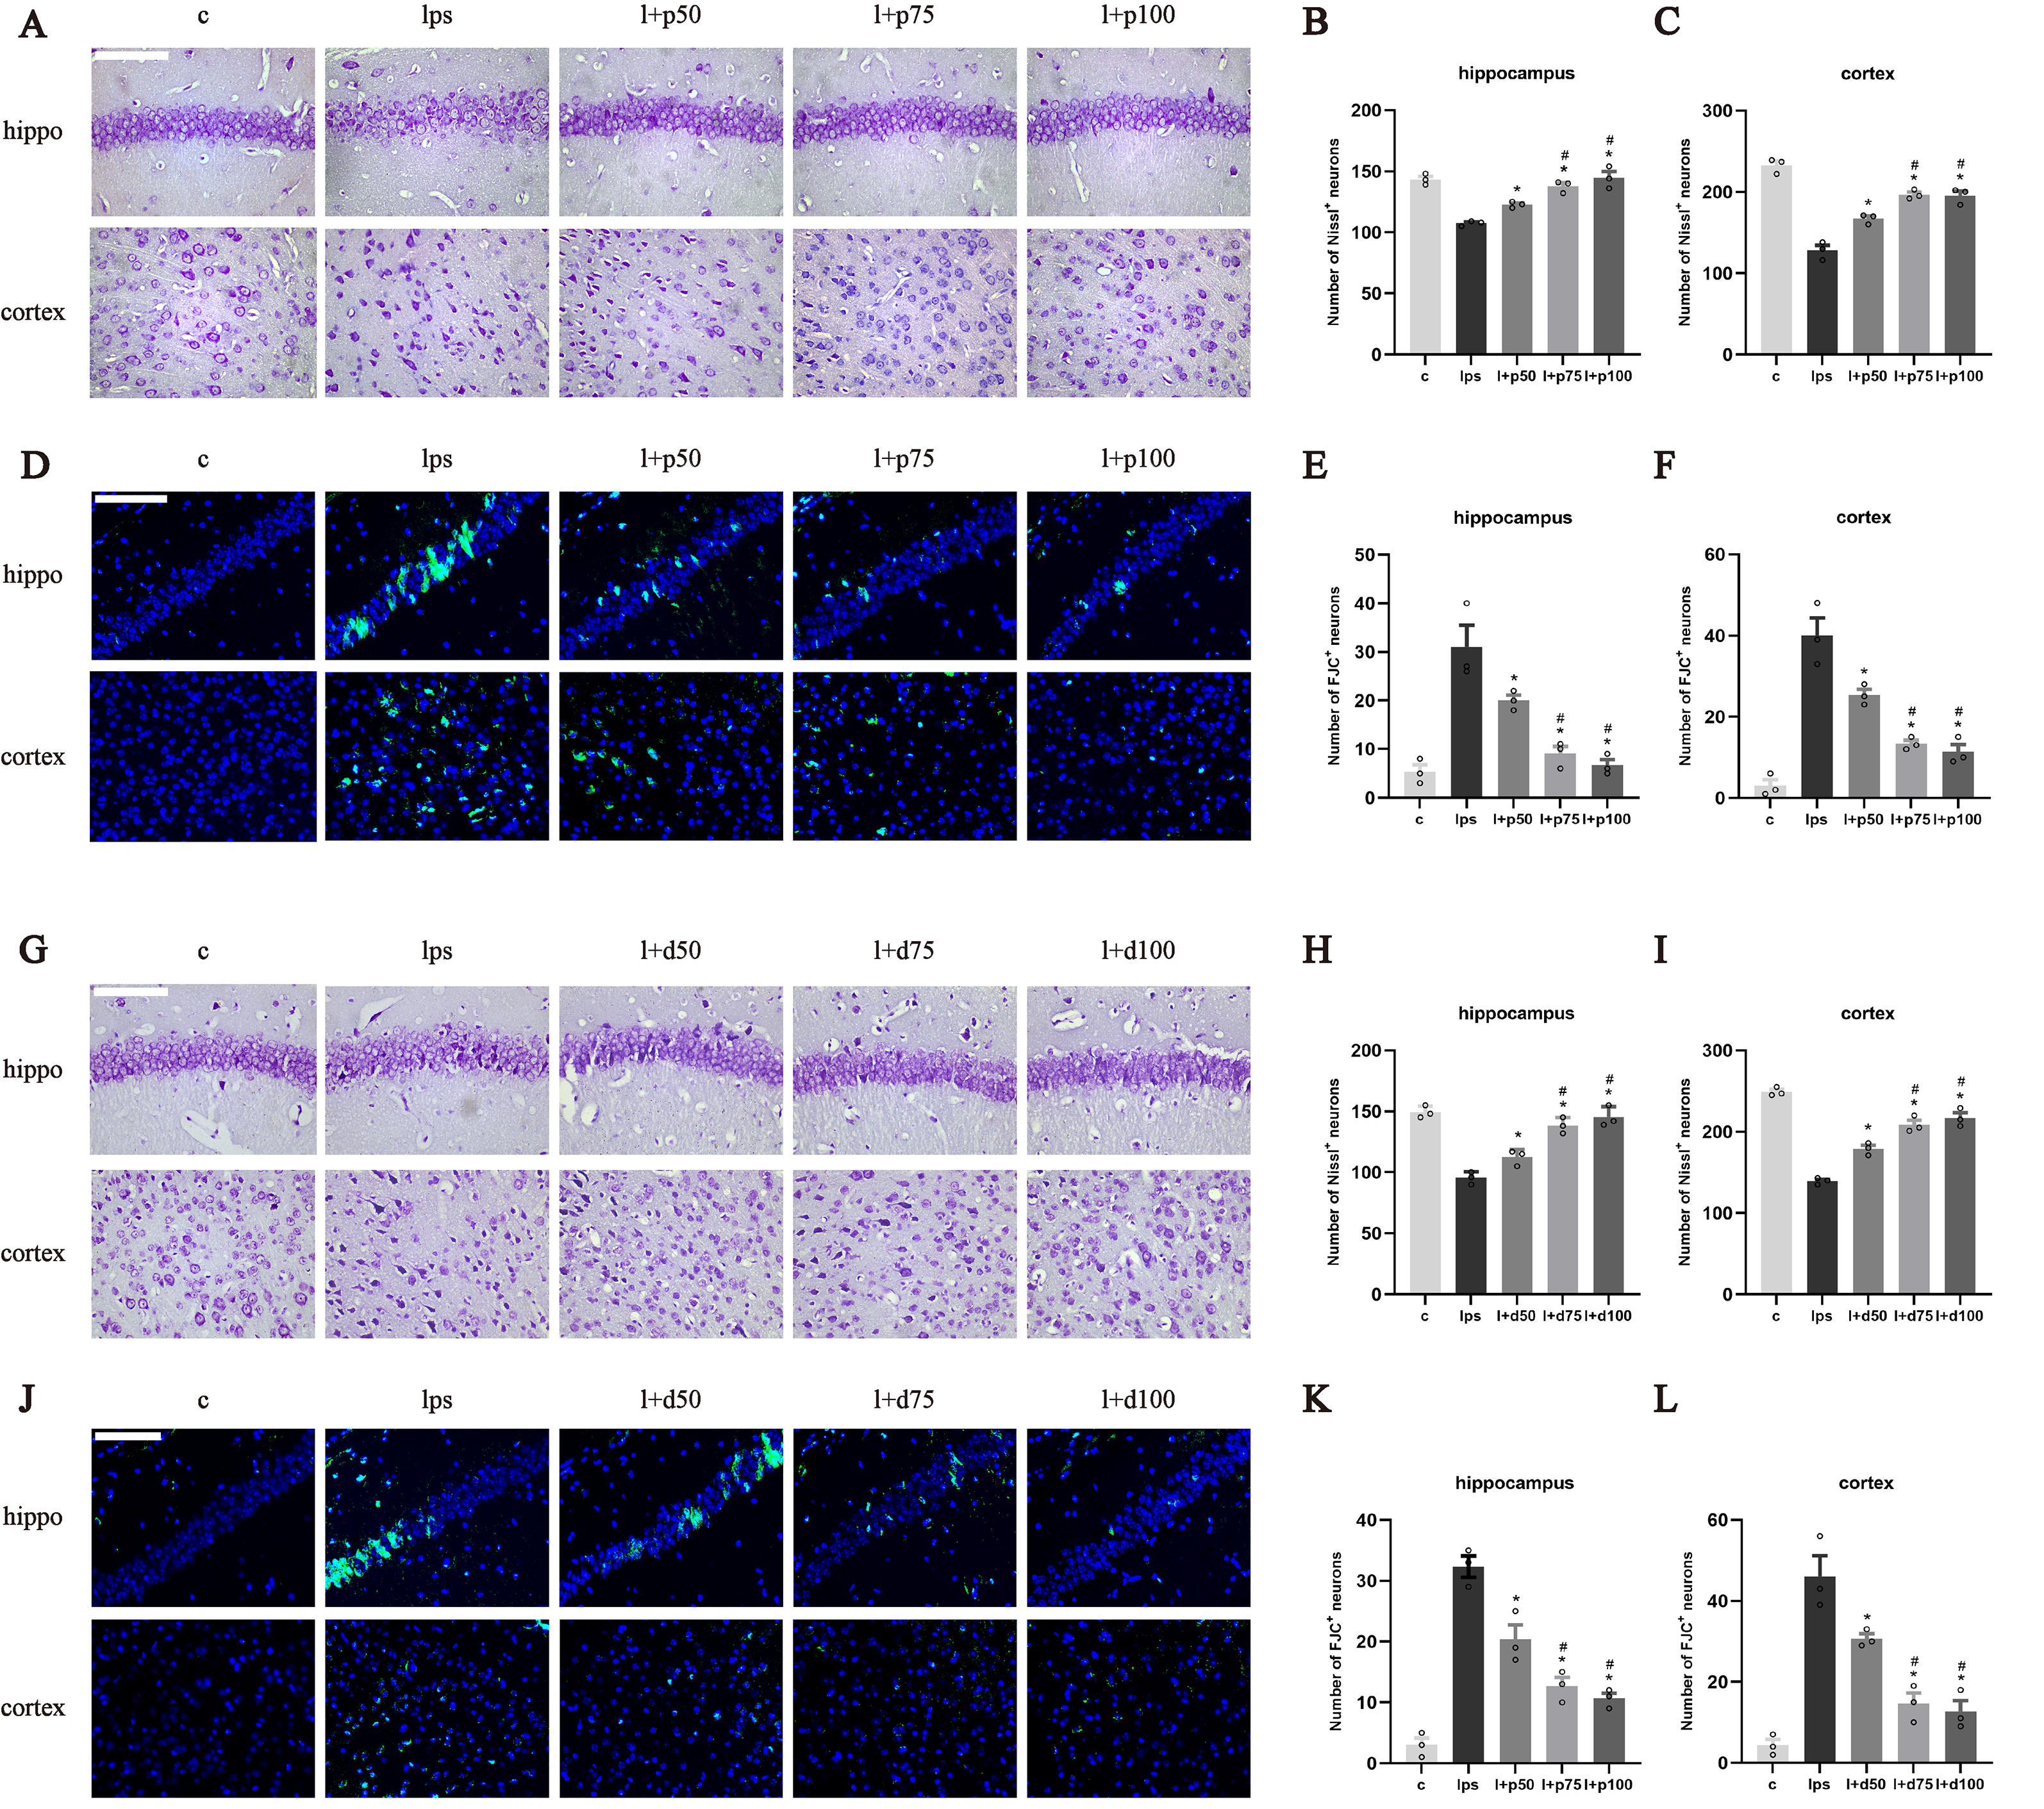


Figure S1. Propofol and dexmedetomidine mitigated LPS-induced brain injury and degeneration in a dose dependent manner.

(A–F) Representative images and statistical graphs of Nissl staining and FJC staining in the propofol administrated groups at different concentrations (400×), scale bars = 50 μm. (G–L) Representative images and statistical graphs of Nissl staining and FJC staining in the dexmedetomidine administrated groups at different concentrations (400×), scale bars = 50 μm. Data are expressed as the mean ± SEM (*p<0.05 vs. lps group; #p<0.05 vs. l+p50 and l+d50 group; n = 6).
